# Supplementary material
Source: publisher figshare collection journal article supplement (https://acs.figshare.com/ndownloader/files/18875303)
Supplement: Supplementary file 1 [file 18875303]

## Supporting Information

### Ferritin Nanocage Conjugated Hybrid Hydrogel for Tissue Engineering and Drug Delivery Applications

*Roya Samanipour<sup>a, b,1</sup>, Ting Wang<sup>a,c,1</sup>, Moritz Werb<sup>a,1</sup>, Hamed Hassannezhad<sup>b</sup>, Juan Manuel Ledesma Range<sup>b</sup>, Mina Hoorfar<sup>b</sup>, Anwarul Hasan<sup>e,f</sup>, Chang Kee Lee<sup>d\*</sup>, Su Ryon Shin<sup>a\*</sup>*

<sup>a</sup> Division of Engineering in Medicine, Department of Medicine, Brigham and Women's Hospital, Harvard Medical School, Boston, MA 02139, USA.

<sup>b</sup> Department of mechanical engineering, School of engineering, University of British Columbia, Kelowna, Canada.

<sup>c</sup> School of Medicine, Jiangsu University, Zhenjiang, Jiangsu 212013, China.

<sup>d</sup> Korea Packaging Center, Korea Institute of Industrial Technology, Bucheon, Republic of Korea.

<sup>e</sup> Department of Mechanical and Industrial Engineering, College of Engineering, Qatar University, Doha, Qatar.

<sup>f</sup> Biomedical Research Centre (BRC), Qatar University– 2713, Doha, Qatar.

<sup>1</sup> Roya Samanipour, Ting Wang, and Moritz Werb contributed equally to this work

\* C.K. Lee and S.R. Shin contributed equally as corresponding authors

Corresponding authors:

Su Ryon Shin

Email address: [sshin4@bwh.harvard.edu](mailto:sshin4@bwh.harvard.edu)

Division of Engineering in Medicine, Department of Medicine, Brigham and Women's Hospital,  
Harvard Medical School, 65 Landsdowne Street, Cambridge, MA 02139, USA.

Office: (617) 835-1164, Fax: (617) 768-8477

Chang Kee Lee

Email address: [withs@kitech.re.kr](mailto:withs@kitech.re.kr)

Korea Packaging Center, Korea Institute of Industrial Technology, Bucheon, Republic of Korea

Office: +82 (032) 624 4774, Fax: +82 (032) 624 4770.

Number of pages: 3

Number of figures: 2

Number of tables: 0

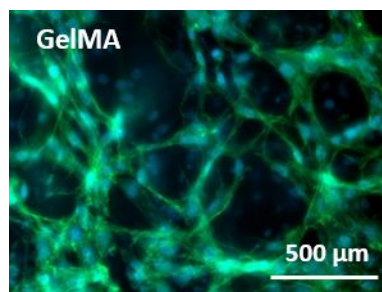

**Supporting Figure S1.** F-actin/DAPI staining of NIH-3T3 fibroblasts encapsulated in 5 wt% GelMA hydrogels with 10 sec UV exposure time after 7 days of culture. DAPI (blue) for nuclei, phalloidin (green) for f-actin.

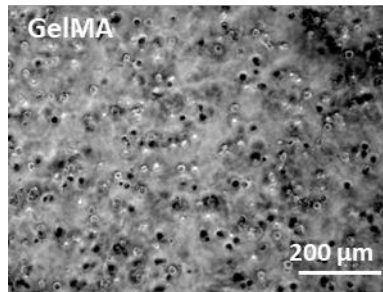

**Supporting Figure S2.** Phase contrast images of NIH-3T3 fibroblasts encapsulated in 5 wt% GelMA hydrogels with 10 sec UV exposure time after 2 days of culture.
